# Supplementary material for: Harnessing the Power of Physiologically Based Pharmacokinetic Modeling to Explore Potential Discordance between in vitro Dissolution, Local Gut vs Systemic Bioequivalence in Health and Disease: The Case of Budesonide in Crohn’s Disease
Source: Preprints.org preprint supplement (doi:10.20944/preprints202308.0400.v1), 2023-08-04
Supplement: Supplementary file 1 [file supplementary]

---

HARNESSING THE POWER OF PHYSIOLOGICALLY BASED  
PHARMACOKINETIC MODELING TO EXPLORE POTENTIAL  
DISCORDANCE BETWEEN IN VITRO DISSOLUTION, LOCAL  
GUT VS SYSTEMIC BIOEQUIVALENCE IN HEALTH AND  
DISEASE: THE CASE OF BUDESONIDE IN CROHN'S DISEASE

---

Chunyan Han <sup>1,2,\*</sup>, Tiancheng Sun <sup>2</sup>, Sirikalyan Chirumamilla<sup>3</sup>, Frederic Bois<sup>3</sup>, Mandy Xu<sup>2</sup>, Amin Rostami-Hodjegan<sup>1,3,\*</sup>

<sup>1</sup> Centre for Applied Pharmacokinetic Research (CAPKR), University of Manchester, UK;  
chunyan.han@pharmaron.com

<sup>2</sup> Pharmaron PK-ADME, Beijing, CN; tiancheng.sun@pharmaron.com; mandy.xu@pharmaron.com

<sup>3</sup> Simcyp Division, Certara Sheffield, UK; sirikalyan.chirumamilla@certara.com; frederic.bois@certara.com

\* Correspondence: chunyan.han@pharmaron.com (C.H.); amin.rostami@manchester.ac.uk (A.R.); Tel.: +86-010-5791-5816 (C.H)

## Appendix SA. Model Parameters and Simulation Results

**Table A1:** Parameters used in budesonide PBPK model

| Parameter                                                               | Value                                                                   | Reference/Comments                                                     |
|-------------------------------------------------------------------------|-------------------------------------------------------------------------|------------------------------------------------------------------------|
| <b>Phys chem and blood binding</b>                                      |                                                                         |                                                                        |
| Compound type                                                           | neutral                                                                 |                                                                        |
| Molecular weight (g/mol)                                                | 430.5                                                                   |                                                                        |
| Log P <sub>o:w</sub>                                                    | 2.62                                                                    | [1]                                                                    |
| fu                                                                      | 0.15                                                                    |                                                                        |
| B:P                                                                     | 0.8                                                                     |                                                                        |
| Plasma Binding Component                                                | HSA                                                                     | [2]                                                                    |
| K <sub>D</sub> to HSA (μM)                                              | 118.53                                                                  | Calculated by Simcyp based on fu of 0.15                               |
| Intrinsic solubility (μg/mL)                                            | 0.028                                                                   | [2]                                                                    |
| <b>Distribution</b>                                                     |                                                                         |                                                                        |
| Model                                                                   | Full PBPK, Method2                                                      |                                                                        |
| Kp scaler                                                               | 0.8                                                                     | Calculated based on observed volume of distribution in IV PK profile   |
| <b>Elimination</b>                                                      |                                                                         |                                                                        |
| CYP3A4 CL <sub>int</sub> (μL/min/10 <sup>6</sup> cell)                  | 4.1                                                                     | Fitted value                                                           |
| CL <sub>R</sub> typical renal clearance for a 20-30yr healthy male(L/h) | 1.55                                                                    | Calculated by fu and the GFR of population representative              |
| <b>Absorption</b>                                                       |                                                                         |                                                                        |
| Model                                                                   | Multi-layer gut wall within ADAM (M-ADAM) model                         |                                                                        |
| Apical P <sub>trans,0</sub> (all segments)(10 <sup>-6</sup> cm/s)       | 1783                                                                    | Calculated by Simcyp by method 2 based on LogP                         |
| Basolateral P <sub>trans,0</sub> (all segments) (10 <sup>-6</sup> cm/s) | 6000                                                                    | Manually adjusted to recover AUC                                       |
| P <sub>para</sub> (10 <sup>-6</sup> cm/s)                               | 0.05506                                                                 | default                                                                |
| Absorption rat scalars                                                  | Duodenum: 0.06<br>Jejunum I-II: 0.12<br>Ileum I-IV: 0.54<br>Colon: 1.44 | Fitted from observed data of locally-administrated budesonide solution |
| Paracellular Effective Molecular Radius                                 | 7.5508                                                                  | default                                                                |
| P-gp CL <sub>int,T</sub> (μL/min)                                       | 42.35                                                                   | Estimated based on best fit to observed PO data of budesonide solution |
| Use GI volume accessible                                                | On                                                                      |                                                                        |

| <b>Parameter</b>                                                                     | <b>Value</b>                                         | <b>Reference/Comments</b> |
|--------------------------------------------------------------------------------------|------------------------------------------------------|---------------------------|
| surface area                                                                         |                                                      |                           |
| Capillary bed permeability-<br>surface area product (L/h)                            | 40                                                   | default                   |
| Effective Concentrations                                                             | Free aqueous<br>concentration                        |                           |
| $D_{\text{eff,bul}}$ Scaler                                                          | 1                                                    | default                   |
| Formulation                                                                          | Controlled/modified<br>release-dispersible<br>system |                           |
| Dissolution profile                                                                  | Weibull                                              |                           |
| $F_{\text{max}}$                                                                     | 100                                                  |                           |
| Alpha                                                                                | 3.1196                                               | Fitted from in-vitro      |
| Beta                                                                                 | 0.93998                                              | dissolution test data     |
| Trigger PH                                                                           | 5.5                                                  |                           |
| Use segregated transit time<br>model                                                 | on                                                   |                           |
| Permit MRT and lag time of<br>particles and pellets to be less<br>than that of fluid | on                                                   |                           |
| Pellet lag time in stomach (h)                                                       | 0                                                    |                           |
| Pellet mean residence time (h)                                                       | Stomach: 0.8<br>Small intestine: 3                   | [3]                       |

## A1. PBPK Models for Healthy Subjects

### A1.1. IV administration

The performance of the PBPK model in recovering the disposition and clearance of budesonide was assessed by the simulation of PK profile after intravenous bolus dose of 0.5 mg budesonide. Budesonide disposition was successfully simulated as shown in Figure A1. Predicted PK parameters were within the predefined 0.8- to 1.25-fold range for internal model verification.

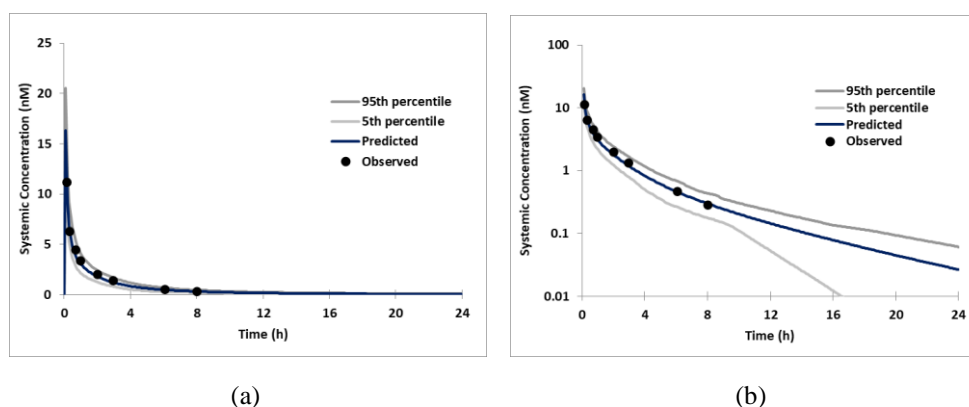

**Figure A1.** Simulation of budesonide plasma concentration for healthy subjects after intravenous administration of 0.5mg budesonide. (a) normal scale; (b) right, semi-log scale.

### A1.2. Solution and Entocort® EC

The exposure of budesonide after local and oral administration was simulated by PBPK model of 2.6 mg (1 mL) solution and 3 mg (10 mL) solution, respectively. After that, the exposure of orally-given budesonide was simulated by model of 18 mg Entocort® EC. The model for extended-release capsule was then externally validated against observed PK data collected in 8 clinical studies with different doses of Entocort® EC.

Regarding the locally-administrated PBPK model, all the ratio of parameters fell within a 0.8-1.25-fold range and concentration time profiles were recovered well by visually check (Table A2, Figure A2). For the orally-administrated solution PBPK model, AUC was overpredicted (1.26-fold) and slightly beyond range of 0.8-1.25 for internal validation. (Table A2, Figure A3) Then the in vitro dissolution profile of the extended-release formulation was incorporated in the oral model to build the PBPK model for Entocort® EC. Simulated AUC and  $C_{max}$  in the internal validation with 18 mg Entocort® EC were within the predefined 0.8- to 1.25-fold range (Table A2, figure A4). External validation against 8 clinical PK studies (Table A2, Figures A5) showed that AUC and  $C_{max}$  were all recovered well (within 2-fold of reported values).

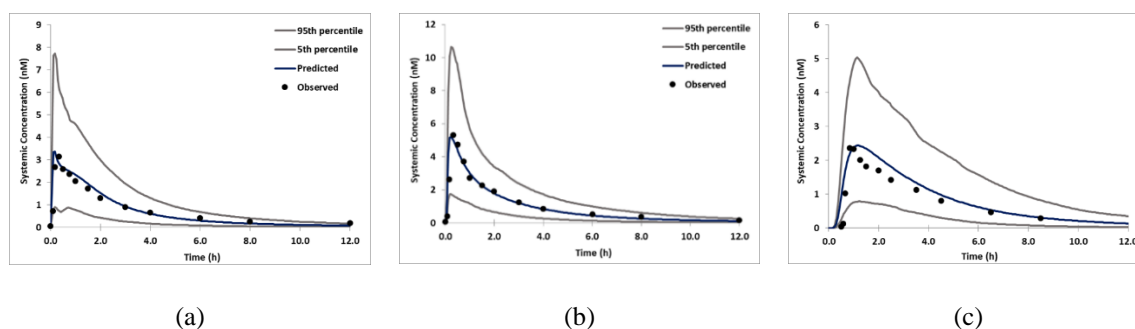

**Figure A2.** Simulation of budesonide plasma concentration for healthy subjects after local administration

of 2.6 mg budesonide solution (a) Jejunum; (b) Ileum; (c) Colon.

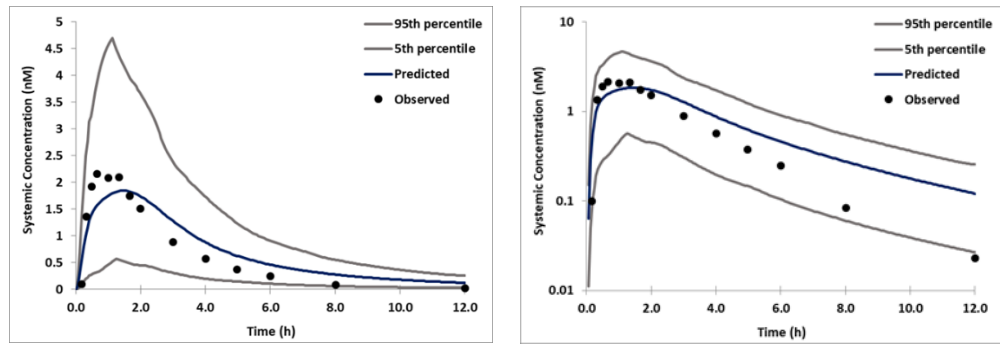

(a)

(b)

**Figure A3.** Simulation of budesonide plasma concentration for healthy subjects after oral administration of 3 mg budesonide solution. (a) normal scale; (b) semi-log scale.

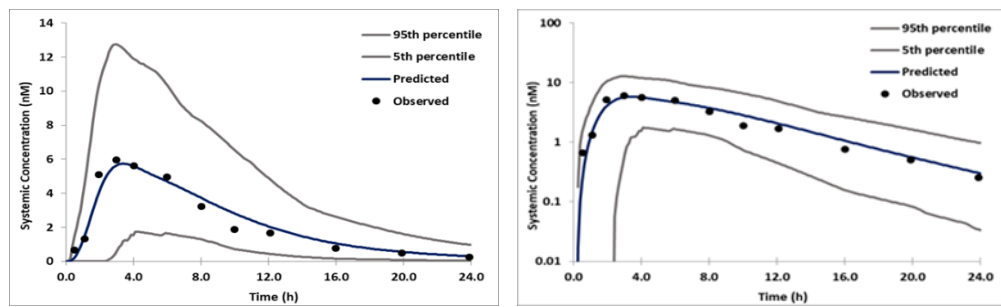

(a)

(b)

**Figure A4.** Simulation of budesonide plasma concentration for healthy subjects after oral administration of Entocort® EC containing 18 mg budesonide. (a) normal scale; (b) semi-log scale.

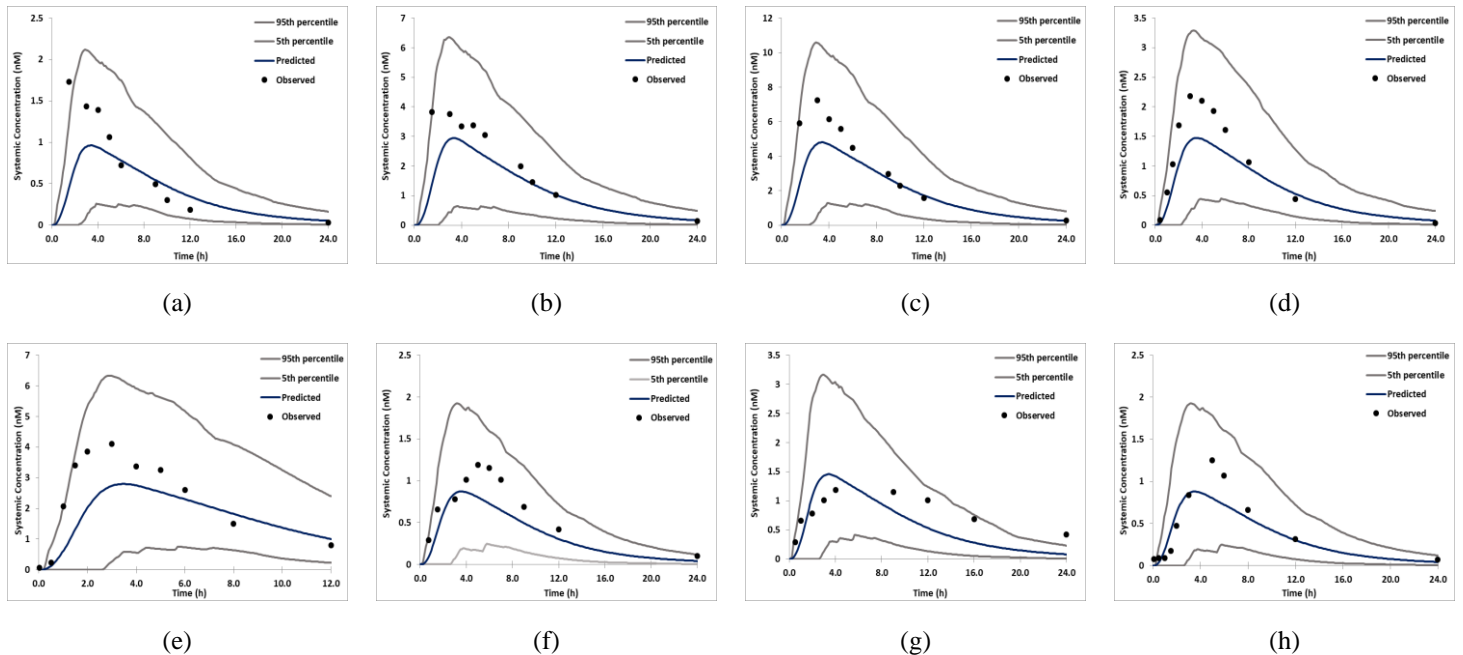

**Figure A5.** Simulation of budesonide plasma concentration for healthy subjects after oral administration of Entocort® EC with different doses for external validation. (a) Study 5-1; (b) Study 5-2; (c) Study 5-3; (d) Study 6; (e) Study 7; (f) Study 8; (g) Study 9; (h) Study 10.

### A1.3. Absorption fraction in GI tract

**Table A2.** Simulated and observed % absorption [12] in local GI tract by deconvolution

| Section                              | Healthy volunteers        |           | CD patients               |           |
|--------------------------------------|---------------------------|-----------|---------------------------|-----------|
|                                      | Reported mean<br>(95% CI) | Simulated | Reported mean<br>(95% CI) | Simulated |
| <b>Upper small intestine</b>         | 24.4 (11.8, 37.0)         | 17.9      | 32.0 (17.4, 46.6)         | 26.8      |
| <b>Ileum</b>                         | 26.6 (19.6, 33.6)         | 28.4      | 17.0 (10.9, 23.1)         | 16.1      |
| <b>Ascending colon</b>               | 42.0 (30.8, 52.7)         | 51.9      | 25.3 (12.2, 38.5)         | 49.4      |
| <b>Transverse + descending colon</b> | 6.9 (0.5, 14.3)           | 1.9       | 26.2 (6.6, 45.8)          | 7.7       |
| <b>Total</b>                         | 100.5                     | 100.1     | 100.5                     | 100       |

### A1.4. Simulations of GI tract local concentrations

As bioequivalence analysis in different sections and layers of GI tract, and the investigation of potential difference between local bioequivalence and plasma bioequivalence were the purpose of this research, simulated concentration-time profiles in these layers/sections in GI tract was checked visually in Figure A6 and simulated  $t_{max}$  and  $C_{max}$  were compared as listed in Table 7. For jejunum and ileum which have multiple sequential compartments in Simcyp, only the first compartment was included in the figure.

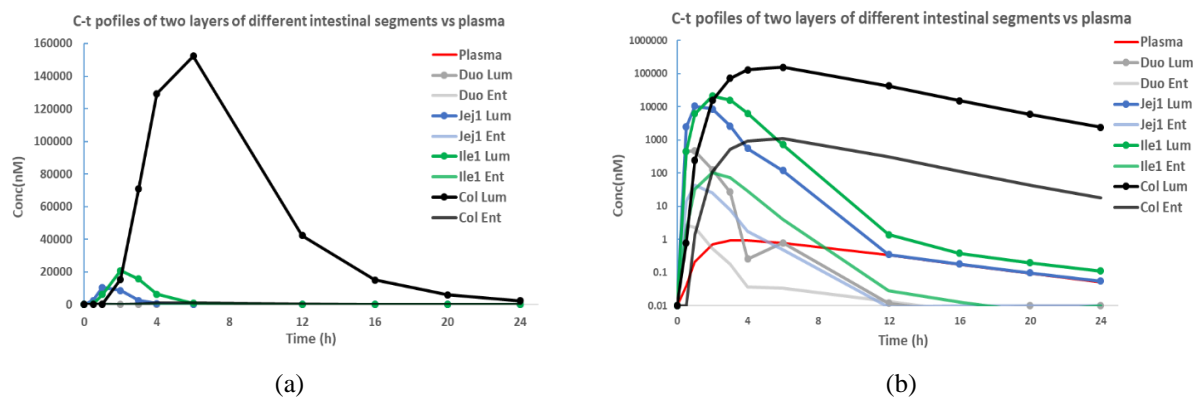

**Figure A6.** Observed plasma concentration (red dots), simulated plasma concentration (red line) and simulated concentrations (lines) in lumen and enterocyte layers of duodenum (grey), jejunum 1 (blue), ileum 1 (green) and colon (black). (a) normal scale; (b) semi-log scale.

### A1.5. Local sensitivity analysis

To figure out the most relevant pathophysiological changes in CD patients resulting potential alternations in AUC and  $C_{max}$  of budesonides after dosing of Entocort® EC, seven parameters were included in local sensitivity analysis. As illustrated in Figure A7 and A8, liver CYP3A4 abundance, SI CYP3A4 abundance, colon CYP3A4 abundance and HSA concentration could influence the pharmacokinetics of budesonide substantially, whereas retention time in stomach and small intestine, and P-gp expression level showed minor effects. Among 4 major effects, hepatic CYP3A4

abundance showed the most significant influence. An enzyme reduction of 76% (137 pmol/mg protein in healthy subjects to 34.35 pmol/mg protein in CD patients) could result in a 3-fold increase of both AUC and  $C_{max}$ . It is easy to understand since the hepatic extraction ratio of budesonide is around 0.6, and CYP3A4 accounts for the majority of hepatic metabolism. The second most influential parameter is SI CYP3A4 abundance. The change from 65.4 nmol/SI in healthy subjects to 8.6 nmol/SI in CD patients could lead to potential increase of AUC and  $C_{max}$  by 19nM\*h and 4.1nM, which account for 52% and 90%, respectively. HSA concentration also determines the pharmacokinetics of budesonide. A decrease by 25 g/L (50.34 g/L in healthy population to 25.2 g/L in healthy population) resulted in an ~50% decrease in both AUC and  $C_{max}$ . A 10-fold difference of colon CYP3A4 abundance resulted in an 83% increase of AUC but only 20% for  $C_{max}$ .

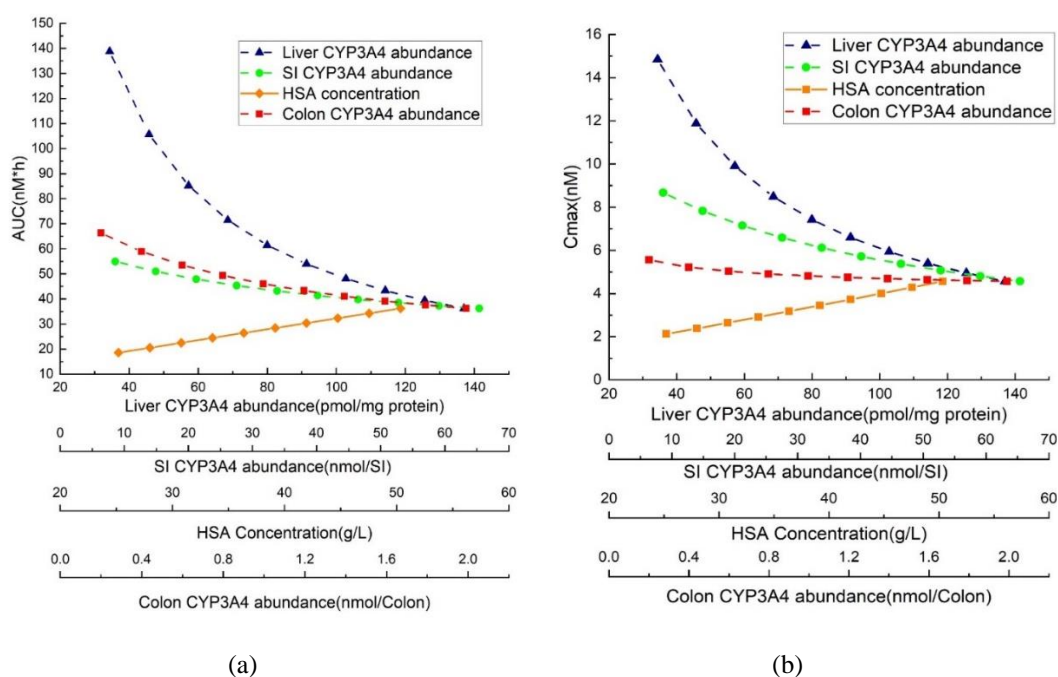

**Figure A7.** Local sensitivity analysis of the parameter which showed significant effects on AUC(a) and  $C_{max}$ (b)

Although GI tract transit time could determine how long the drug is exposed to the digestive tract and thus the absorption percentage, gastric MRT and SI MRT showed very low impact on the exposure of budesonide. Even though budesonide is a P-gp substrate, the decrease of transporter abundance from 0.4 to 0.075 pmol/mg total membrane protein didn't lead to any noticeable change in AUC and  $C_{max}$ . It might be because the concentration in the digestive tract is high enough to saturate transport of budesonide by P-gp.

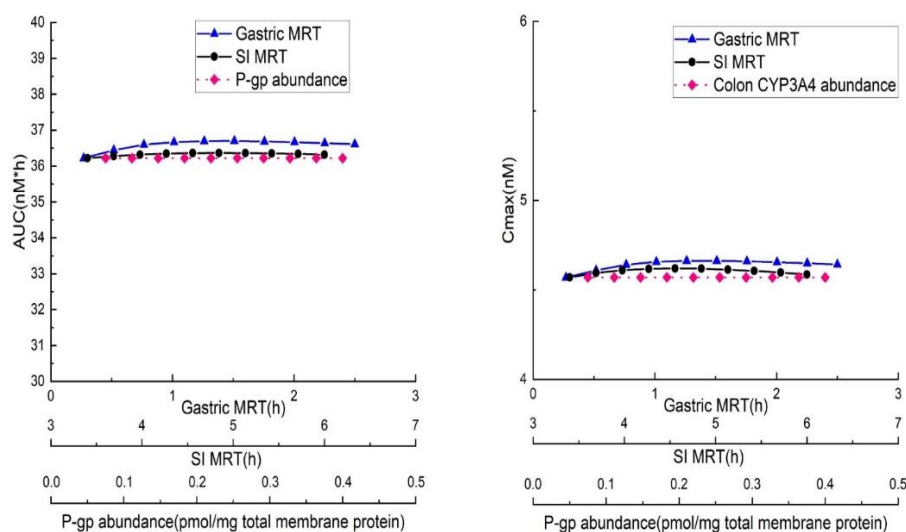

(a)

(b)

**Figure A8.** Local sensitivity analysis of the parameter which showed minor effects on AUC (a) and  $C_{max}$  (b)

## A2 Model for Crohn's Disease Population

Based on the result of sensitivity analysis, parameters that show major influence to pharmacokinetic behavior of budesonide were modified to build CD patient population. Predicted and observed budesonide plasma profiles after Entocort® EC (containing 9 mg of budesonide) administration in CD patients in fasted state are shown in Figure A9. The respective PK parameters are presented in Table A2. Results suggest that the PK profile of budesonide could be appropriately simulated by the PBPK model, and simulated AUC and  $C_{max}$  are both within the 2-fold range for external validation.

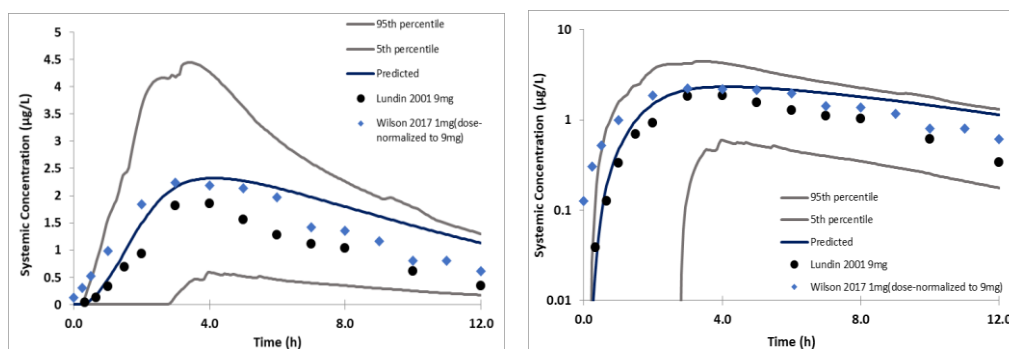

(a)

(b)

**Figure A9.** Simulation of budesonide plasma concentration for CD patients after oral administration of Entocort® EC with 9 mg budesonide. (a) normal scale; (b) semi-log scale.

Although the fitting parameters (simulated/observed) of the Entocort® EC PBPK model in CD patients passed the 2-fold cut-off, clearance of budesonide in CD patient seems to be underestimated as indicated by the shape of the terminal elimination phase. Further investigation showed that the slope in this terminal phase is greatly influenced by the colon CYP3A4 abundance. Increasing the



colon CYP content from 0.2 in CD patients to higher values could better recover the observed patient PK profiles while having almost no influence to  $C_{max}$ . As the reported colon CYP3A4 abundance was collected with intestinal tissues collected in surgery, indicating certain seriousness of the disease, the current model was used in subsequent BE analysis representing a worst-case scenario.

## Reference

1. Effinger, A. et al. (2021) Predicting budesonide performance in healthy subjects and patients with Crohn's disease using biorelevant in vitro dissolution testing and PBPK modeling. *European Journal of Pharmaceutical Sciences* 157, 105617
2. Alrubia, S. et al. (2022) Altered bioavailability and pharmacokinetics in Crohn's disease: capturing systems parameters for PBPK to assist with predicting the fate of orally administered drugs. *Clinical Pharmacokinetics* 61, 1365-1392
3. Edsbäcker, S. et al. (2003) A pharmacoscintigraphic evaluation of oral budesonide given as controlled-release (Entocort) capsules. *Alimentary Pharmacology & Therapeutics* 17 (4), 525-536
